# Supplementary material for: A label-free electrochemical immunosensor based on poly(thionine)–SDS nanocomposites for CA19-9 detection
Source: Royal Society of Chemistry journal article supplement (doi:10.1039/c5ay00576k), 2015-01-01
Supplement: c5ay00576k1.pdf [file c5ay00576k1.pdf]

Cite this: DOI: 10.1039/c0xx00000x

www.rsc.org/xxxxxx

**Paper**

**Electronic Supporting Information:**

**A label-free electrochemical immunosensor based on poly(thionine)-SDS nanocomposites for CA19-9 detection**

**Zhouqian Jiang,<sup>a</sup> Chengfei Zhao,<sup>b</sup> Liqing Lin,<sup>a</sup> Shaohuang Weng,<sup>a</sup> Qicai Liu,<sup>c</sup> and Xinhua Lin<sup>a</sup>**

*5 Received (in XXX, XXX) Xth XXXXXXXXXX 20XX, Accepted Xth XXXXXXXXXX 20XX*

DOI: 10.1039/b000000x

Cite this: DOI: 10.1039/c0xx00000x

www.rsc.org/xxxxxx

Paper

*The effect of pH at the PThi-SDS/GCE electrode*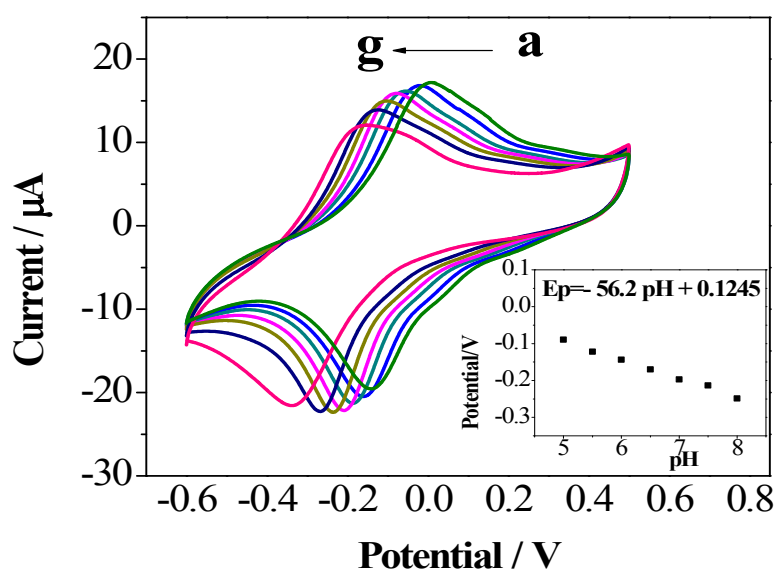

Fig. S1. Cyclic voltammograms of PThi-SDS/GCE electrode in pH: (a) 4.0, (b) 4.5, (c) 5.0, (d) 5.5, (e) 6.0, (f) 6.5, (g) 7.0, the inset is plots of  $E_p$  vs. pH

Cite this: DOI: 10.1039/c0xx00000x

www.rsc.org/xxxxxx

*Optimization of experimental conditions*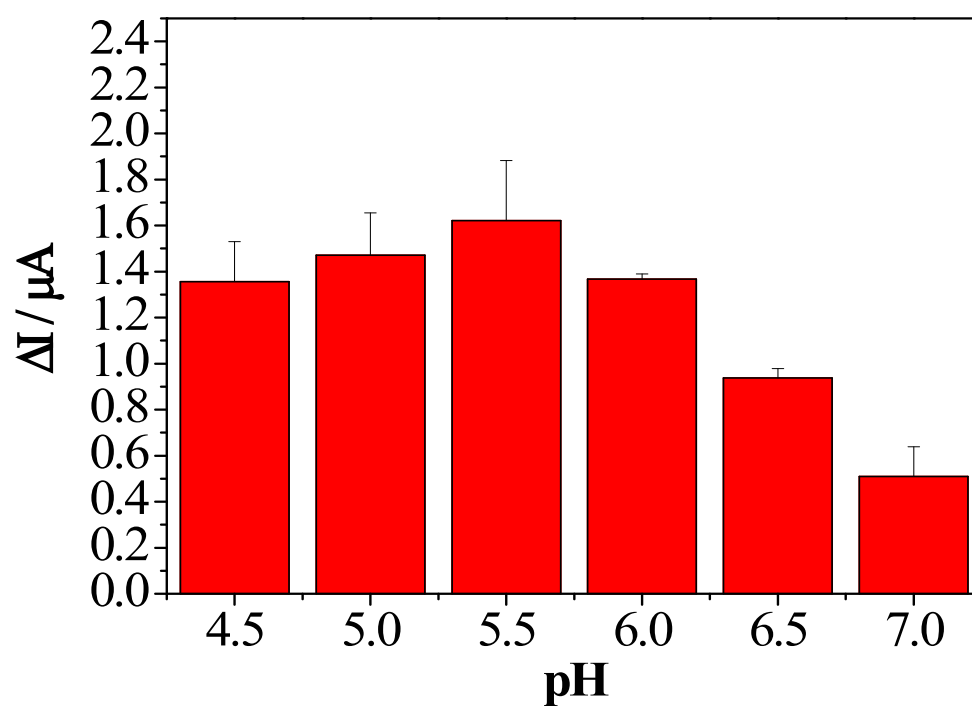

Fig. S2 Effects of pH of detection solution for antigen-antibody reaction

Cite this: DOI: 10.1039/c0xx00000x

www.rsc.org/xxxxxx

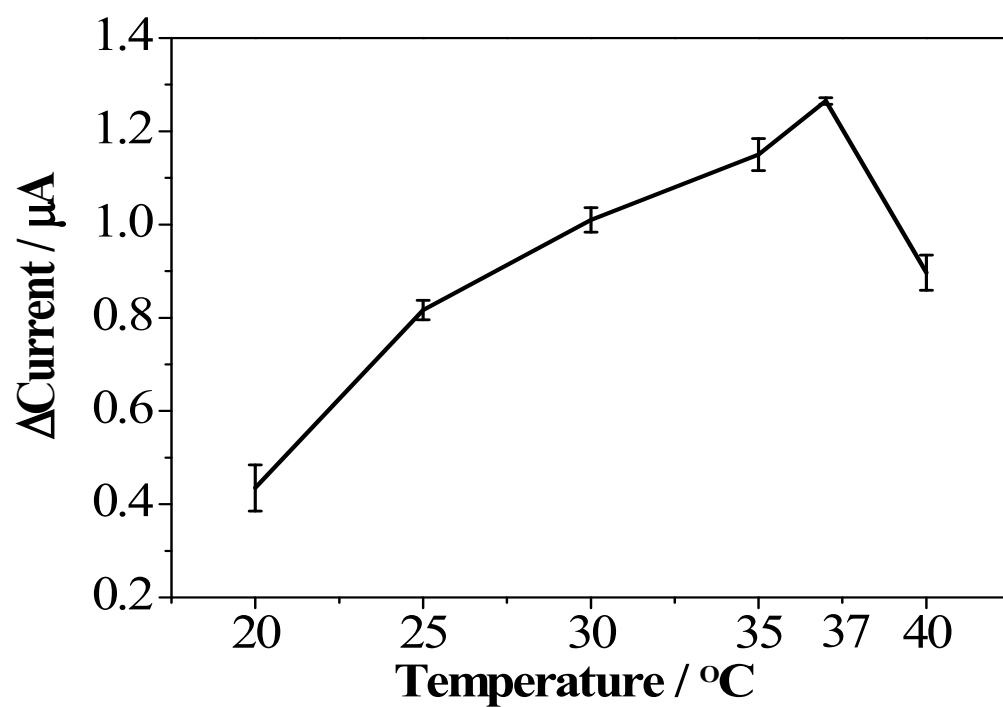

Fig. S3 Effects of reaction temperature for antigen-antibody.

Cite this: DOI: 10.1039/c0xx00000x

www.rsc.org/xxxxxx

**Paper**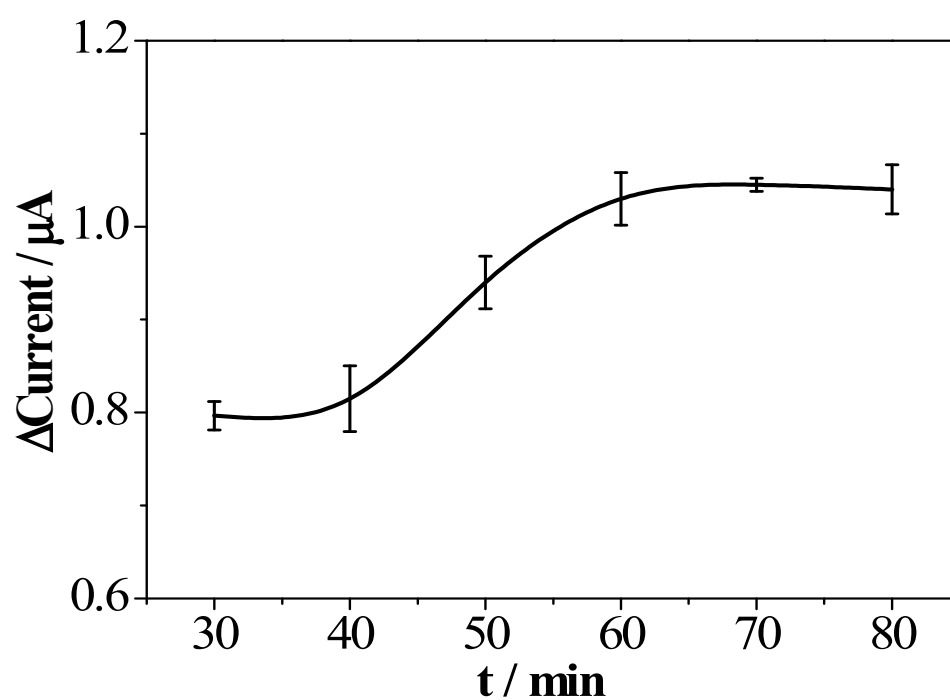

Fig. S4 Effects of reaction time for antigen-antibody.
